# Supplementary material
Source: ML conference proceedings conference paper supplement (https://www.ecva.net/papers/eccv_2024/papers_ECCV/html/5282_ECCV_2024_paper.php)
Supplement: Supplementary file 1 [file 05282-supp.pdf]

## Supplementary Material

### 8 Details in Stage I

#### 8.1 Multi-View Consistent Initialization

We utilize the multi-view depth-conditioned albedo diffusion model from RichDreamer [33] for the initialization. The rendered depth maps are concatenated with the latent features to serve as input for the UNet denoiser [34]. We only sample 8 images around the underlying 3D model instead of an overcomplete set, and we unproject all images to get an averaged RGB UV map as initialization. The invisible regions on the UV map are extracted by pixel detection and inpainted [47] by the region neighborhood. The inpainted UV map is then decoded to latent space and noised to the specified diffusion step. Although the sampled images have fewer details and are averaged in UV space, this is sufficient for initialization [28].

#### 8.2 Defects in Latent UV Mapping

Figure 10 illustrates why details are dropped during the aggregation step when using latent UV map. Each pixel of the latent image represents a patch (e.g.,  $8 \times 8$ ) of the original image. Latent pixels warping means patches warping on RGB space, which inevitably leads to blurring or jagged lines after decoding.

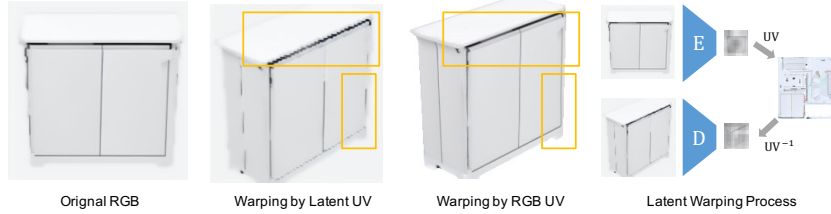

**Fig. 10:** The left image is the original RGB image. The second column is the warping image caused by latent UV. The third column is the warping image by RGB UV. Using RGB UV warping, everything is in good order. Using latent UV warping, the straight horizontal line becomes a set of horizontal line segments, and the details are blurred.

### 9 Texture Stitching details

In this section, we provide details on the formulations of  $\phi_f(z_f)$  and  $\phi_{ff'}(z_f, z_{f'})$ . **Formulation of  $\phi_f(z_f)$ .** With  $\mathcal{C}_{f,i} = \{\mathbf{c}\}$  we denote all colors of pixels of image  $I_i$  associated with face  $f$ . Let  $\mathcal{C}_f = \cup_{1 \leq i \leq k} \mathcal{C}_{f,i}$  collect all the colors of the pixels associated with the face  $f$ . We perform mean sift clustering among  $\mathcal{C}_f$ .

With  $\mathbf{c}_f$  and  $\sigma_f$  we denote the center of the cluster and the associated variance, respectively. We then define

$$\phi_f(z_f) = \begin{cases} +\infty & \mathcal{C}_{f,z_f} = \emptyset \\ \frac{1}{\mathcal{C}_{f,z_f}} \sum_{\mathbf{c} \in \mathcal{C}_{f,z_f}} \frac{\|\mathbf{c} - \mathbf{c}_f\|^2}{2\sigma_f^2} & \text{otherwise} \end{cases} . \quad (8)$$

**Formulation of  $\phi_{ff'}(z_f, z_{f'})$ .** Denote  $\mathcal{P}_{f,i}$  as the set of pixels in  $I_i$  that belong to face  $f$ . If  $\mathcal{P}_{f,i} \neq \emptyset$ , we compute  $\mathbf{f}_{f,i} = (\bar{\mathbf{c}}_{f,i}, \mu \bar{\mathbf{d}}_{f,i}^{\text{SIFT}})$ , where  $\bar{\mathbf{c}}_{f,i}$  is the average pixel color among  $\mathcal{P}_{f,i}$  and  $\bar{\mathbf{d}}_{f,i}^{\text{SIFT}}$  is the average SIFT pixel descriptor among  $\mathcal{P}_{f,i}$ . We set  $\mu = 1$  in this paper. Note that instead of merely using color differences, we observe that incorporating SIFT helps place cuts among textureless regions.

Our definition of  $\phi_{ff'}(z_f, z_{f'})$  differs from that of [49] in the sense that we take advantage of the consistency of the images, in contrast to simply using color differences. Specifically,

- When  $\mathcal{P}_{f,z_f} = \emptyset$  or  $\mathcal{P}_{f',z_{f'}} = \emptyset$ ,

$$\phi_{ff'}(z_f, z_{f'}) = +\infty. \quad (9)$$

- When  $\mathcal{P}_{f,z_{f'}} = \emptyset$  and  $\mathcal{P}_{f',z_f} = \emptyset$ ,

$$\phi_{ff'}(z_f, z_{f'}) = \|\mathbf{f}_{f,z_f} - \mathbf{f}_{f',z_{f'}}\|^2. \quad (10)$$

- When  $\mathcal{P}_{f,z_{f'}} \neq \emptyset$  and  $\mathcal{P}_{f',z_f} = \emptyset$ ,

$$\phi_{ff'}(z_f, z_{f'}) = \|\mathbf{f}_{f,z_f} - \mathbf{f}_{f,z_{f'}}\|^2. \quad (11)$$

- When  $\mathcal{P}_{f,z_{f'}} = \emptyset$  and  $\mathcal{P}_{f',z_f} \neq \emptyset$ ,

$$\phi_{ff'}(z_f, z_{f'}) = \|\mathbf{f}_{f,z_f} - \mathbf{f}_{f',z_f}\|^2. \quad (12)$$

- When  $\mathcal{P}_{f,z_{f'}} \neq \emptyset$  and  $\mathcal{P}_{f',z_f} \neq \emptyset$ ,

$$\phi_{ff'}(z_f, z_{f'}) = \frac{1}{2} \left( \|\mathbf{f}_{f,z_f} - \mathbf{f}_{f',z_f}\|^2 + \|\mathbf{f}_{f,z_f} - \mathbf{f}_{f,z_{f'}}\|^2 \right). \quad (13)$$

Note that we only compute the color difference in Eq. (10) when  $z_f$  and  $z_{f'}$  are not available in either  $f$  or  $f'$ . Otherwise, we employ the color consistency in Eqs. (11) to (13) which better reveals the appearance continuity after stitching.

## 10 Visualization of Ablation Study

Figure 11 is a visualization of ablation study. The green box in “No alternating optimization” indicates that the inconsistency issues were partly resolved during view selection and alignment stages.

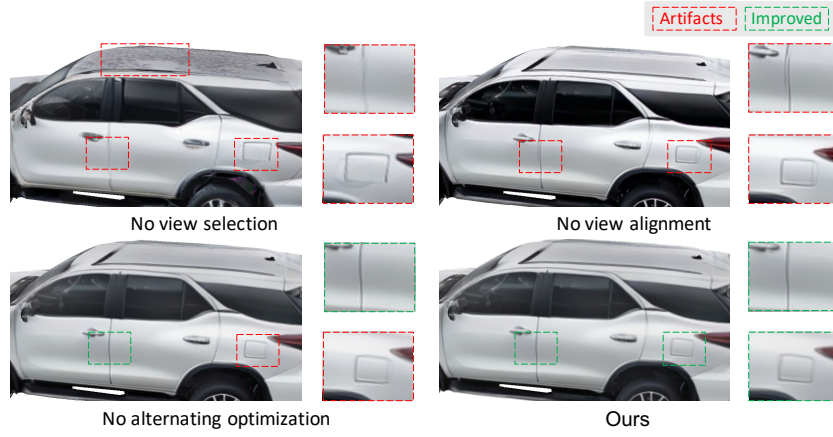

Fig. 11: Visualization of Ablation Study

## 11 Additional Results

### 11.1 Additional Baselines

The latest non-open source methods TexFusion [1] and Decorate3D [12] are compared with our method in Fig. 12 and Fig. 13, from where we see that our results are more natural in color and have clearer details.

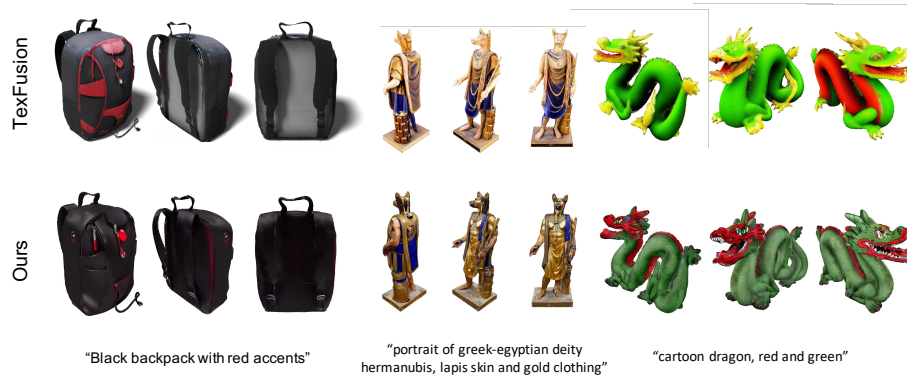

Fig. 12: Qualitative comparison with TexFusion: clearer details.

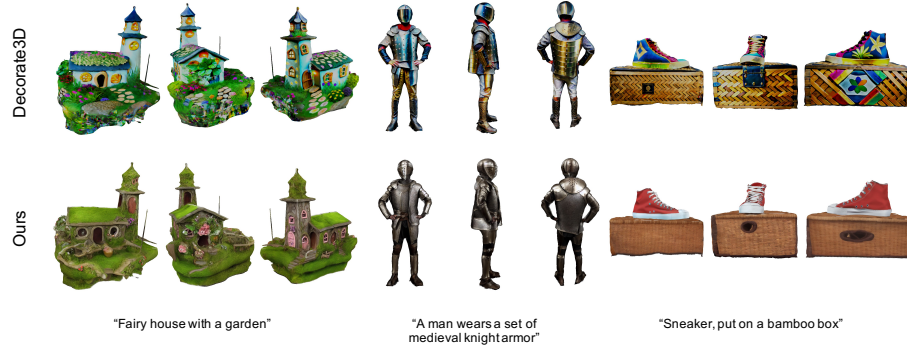

**Fig. 13:** Qualitative comparison with Decorate3D: more natural in color.

## 11.2 More Visual Results

Figure 14 shows the results of different prompts on the same mesh. We present more visual results on 25 objects from different categories in GObjaverse dataset [33] in Figs. 15 to 17. Each textured mesh is rendered to 8 views. A full list of object indexes and prompts can be found in Tab. 2.

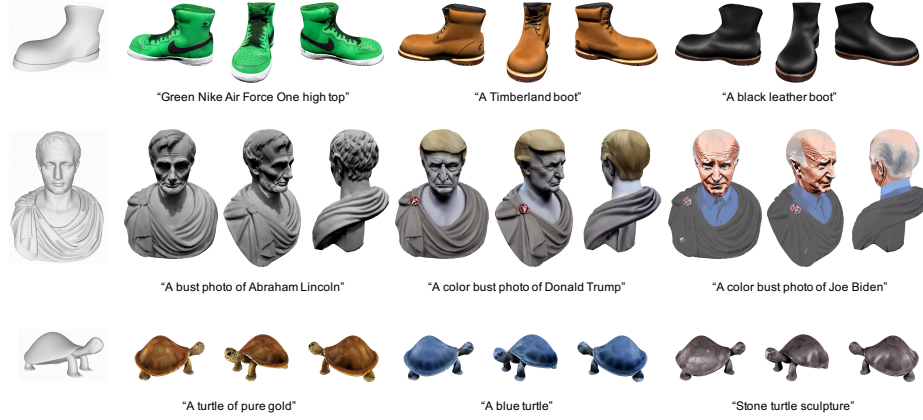

**Fig. 14:** Different prompts for the same mesh.

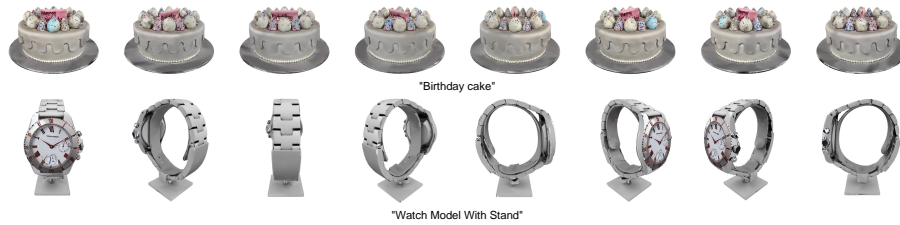

**Fig. 15:** Gallery of textured meshes.



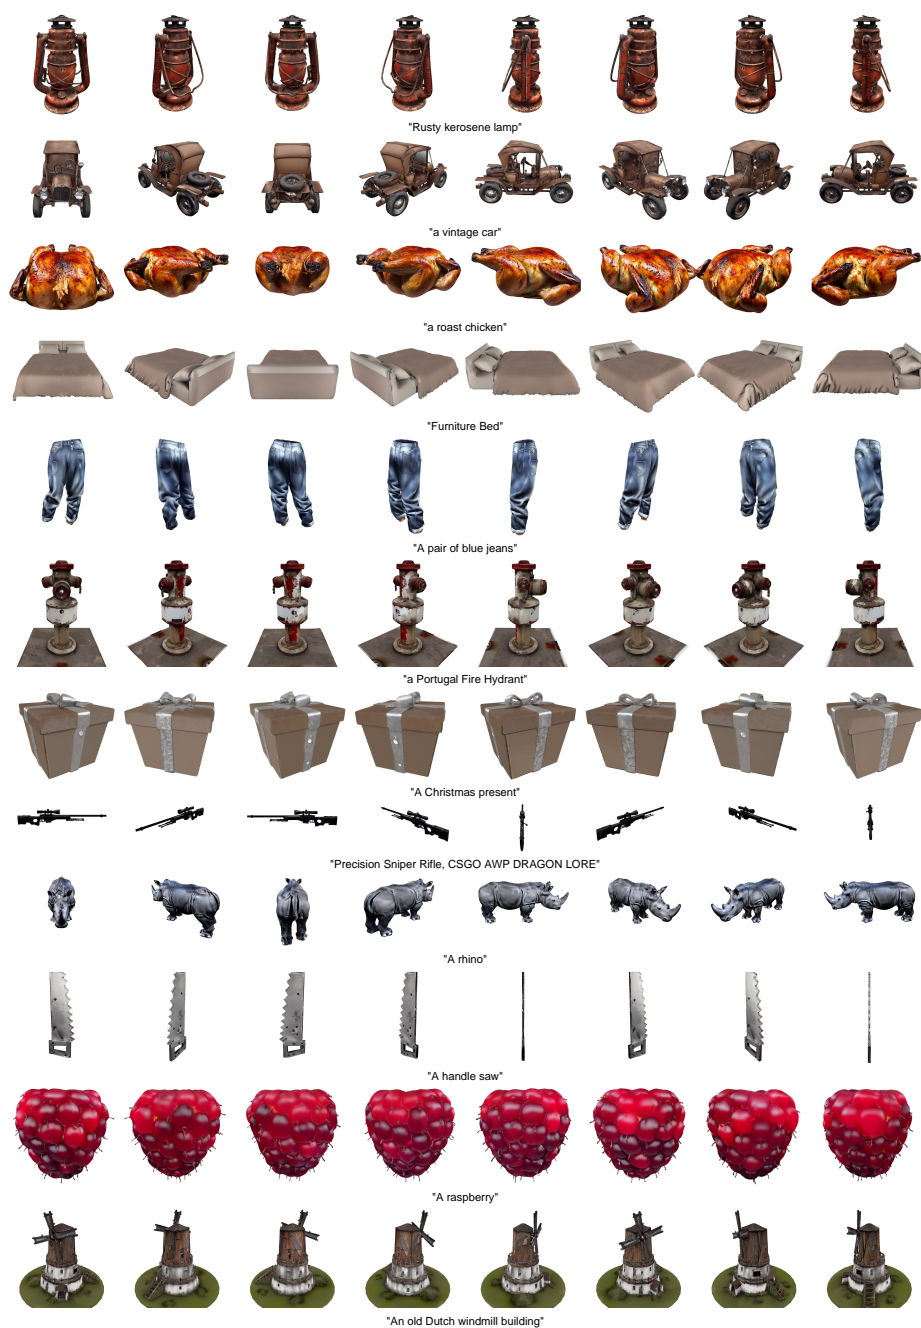

Fig. 16: Gallery of textured meshes.

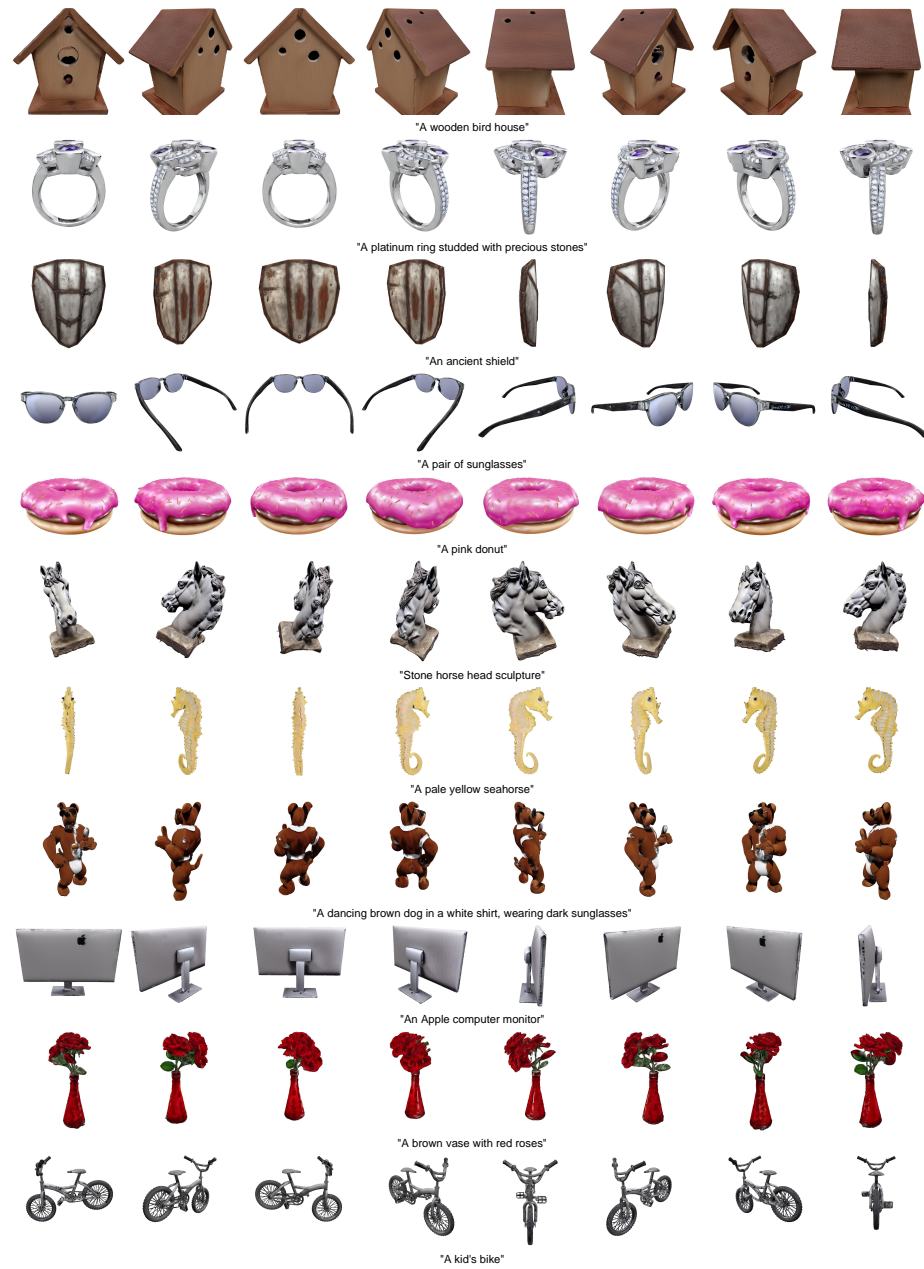

Fig. 17: Gallery of textured meshes.

**Table 2:** The object indexes and the corresponding text prompts.

| Object Index                     | Prompt                                                        |
|----------------------------------|---------------------------------------------------------------|
| 0002c6eafa154e8bb08ebafb715a8d46 | Birthday cake                                                 |
| 000f88bb21164319ae797d315be6bc0e | Watch Model With Stand                                        |
| 0023717f4f564cc99f4ded70db04f590 | Rusty kerosene lamp                                           |
| 0023b3edbc114be188ca9d8f729dfaaf | a vintage car                                                 |
| 0025c5e2333949feb1db259d4ff08dbe | A wooden bird house                                           |
| 00286954e2d54db8bc7832cc8682b6ff | Furniture Bed                                                 |
| 002e02c30121465c8a01bcb83b584ea5 | A pair of blue jeans                                          |
| 003199cc6ff2410cb2d8e6f8a9cbb163 | a Portugal Fire Hydrant                                       |
| 0032696f5871429fbd0549d9628f812c | A Christmas present                                           |
| 0033322379a24798a6875a5cb2de54f5 | A raspberry                                                   |
| 0046f208ef8d4988ba7bb9d297f29ec7 | An old Dutch windmill building                                |
| 004fb4d72f6c4e55a15b9025a868d1a3 | a roast chicken                                               |
| 0056880681c044cb9fe815a9eed0425d | A rhino                                                       |
| 00602ef508784e5384665aacaaf1f3a0 | A handle saw                                                  |
| 0064add4992b426cb2f862e5875ebf6d | A pink donut                                                  |
| 0083fa5f10a442408e0f3f88df19c8ad | An ancient shield                                             |
| 0087dc01648d4cc792a7d1e49848b825 | Stone horse head sculpture                                    |
| 00978a128283411582590096643ec101 | A pale yellow seahorse                                        |
| 00b267b43669422cbb4ec3a4e9b1c16e | A pair of sunglasses                                          |
| 00d56831f9bc49f9a668f418c1af7558 | A dancing brown dog in a white shirt, wearing dark sunglasses |
| 010b9ece8a3a49e3b73be0b3cd02c720 | A brown vase with red roses                                   |
| 011f2cd821e94596863378daa134cf0e | An Apple computer monitor                                     |
| 013c3a1d945a4336a87f889c3d4c25b1 | Precision Sniper Rifle, CSGO AWP DRAGON LORE                  |
| 015777939fc3429ba4b5343be9d51ffa | A kid's bike                                                  |
| 017fe235577b4083ab32c2b7949ba022 | A platinum ring studded with precious stones                  |
